# Supplementary material for: Comprehensive Analysis of Clinically Relevant Copy Number Alterations (CNAs) Using a 523-Gene Next-Generation Sequencing Panel and NxClinical Software in Solid Tumors
Source: MDPI journal article supplement (doi:10.3390/genes15040396), 2024-03-23
Supplement: s1 [file s1]

**Supplementary Material:**

**Supplementary Table S1.** List of 24 CNAs studied in the present study along with their potential cancer associated with them.

| S.No. | Studied genes/regions | Potential Cancer associations                     |
|-------|-----------------------|---------------------------------------------------|
| 1     | ALK (2p23. 2–p23. 1)  | Lung [37,38], Lymphoma [39]                       |
| 2     | PIK3CA (3q26)         | Breast and Ovarian [40], Lung [41], Prostate [42] |
| 3     | RAF1 (3p26.3 - p25.2) | Ovarian [43], Lung [44]                           |
| 4     | PDGFRA (4q12)         | Breast [45]                                       |
| 5     | FGFR3 (4p16.3)        | Ovarian [46], Prostate [47]                       |
| 6     | Chr5q32               | Breast [48,49]                                    |
| 7     | RICTOR (5p13. 1)      | Breast [50], Melanoma [51]                        |
| 8     | BRAF (7q34)           | Melanoma [36], Ovarian and colorectal [52]        |
| 9     | MET (7q21-q31)        | Prostate [53], Melanoma [54]                      |
| 10    | CDK6 (7q21.2)         | Melanoma [55], Ovarian [56], Prostate [65]        |
| 11    | EGFR (7p11. 2)        | Breast [35]                                       |
| 12    | FGFR1 ( 8p11. 23)     | Prostate [34]                                     |
| 13    | MYC (8q24.21)         | Pancreatic [57], Prostate [58]                    |
| 14    | CCDN1 (11q13)         | Ovarian [59], Breast [60]                         |
| 15    | FGF19 (11q13)         | Breast [61], Pancreatic [62]                      |
| 16    | KRAS (12p12.1)        | Ovarian [63,64]                                   |
| 17    | CDK4 (12q14.1)        | Melanoma [55], Prostate [65]                      |
| 18    | MDM2 (12q14. 3-q15)   | Pancreatic [66], Ovarian [67]                     |
| 19    | FANCC (16q24.3)       | Breast [68,69]                                    |
| 20    | ERBB2 (17q12)         | Breast [70]                                       |
| 21    | TP53 (17p13)          | Breast [32]                                       |
| 22    | CCNE1 (19q12)         | Melanoma [71]                                     |
| 23    | KEAP1 (19p13.2)       | Melanoma [72], Prostate [73]                      |
| 24    | AR                    | Prostate [73]                                     |

**Supplementary Table S2.** Categorization of CNAs detected by analysis in NxClinical with TSO500 and OncoScan

| Workflow            | Gain | Amplification<br>(High copy gain) | Loss | Total CNAs |
|---------------------|------|-----------------------------------|------|------------|
| NxClinical-TSO500   | 34   | 12                                | 8    | 54         |
| NxClinical-OncoScan | 34   | 12                                | 8    | 54         |
